# Supplementary material for: Tuning ferroelectricity and ferromagnetism in BiFeO3/BiMnO3 superlattices
Source: Royal Society of Chemistry journal article supplement (doi:10.1039/c9nr09670a), 2020-01-01
Supplement: c9nr09670a1.pdf [file c9nr09670a1.pdf]

## Supporting Information

### Tuning Ferroelectricity and Ferromagnetism in BiFeO<sub>3</sub>/BiMnO<sub>3</sub> Superlattices

Cai Jin,<sup>a,b</sup> Wanrong Geng,<sup>c</sup> Linjing Wang,<sup>b</sup> Wenqiao Han,<sup>b</sup> Dongfeng Zheng,<sup>d</sup> Songbai Hu,<sup>b</sup> Mao Ye,<sup>b</sup> Zedong Xu,<sup>b</sup> Yanjiang Ji,<sup>b</sup> Jiali Zhao,<sup>e</sup> Zuhuang Chen,<sup>f</sup> Gan Wang,<sup>b</sup> Yunlong Tang,<sup>c</sup> Yinlian Zhu,<sup>c</sup> Xiuliang Ma<sup>c</sup> and Lang Chen<sup>\*,b</sup>

<sup>a</sup>School of Physics, Harbin Institute of Technology, Harbin 150081, China.

<sup>b</sup>Department of Physics, Southern University of Science and Technology, Shenzhen 518055, China.

<sup>c</sup>Shenyang National Laboratory for Materials Science, Institute of Metal Research, Chinese Academy of Sciences, Wenhua Road 72, 110016 Shenyang, China.

<sup>d</sup>Guangdong Provincial Key Laboratory of Quantum Engineering and Quantum Materials and Institute for Advanced Materials, South China Academy of Advanced Optoelectronics, South China Normal University, Guangzhou 510006, China.

<sup>e</sup>Laboratory of Synchrotron Radiation, Institute of High Energy Physics, Chinese Academy of Sciences, Beijing 100039, China

<sup>f</sup>School of Materials Science and Engineering, Harbin Institute of Technology, Shenzhen 518055, China.

\* E-mail: [chenlang@sustech.edu.cn](mailto:chenlang@sustech.edu.cn)

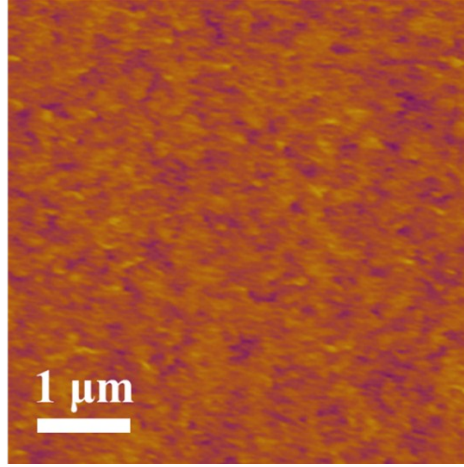

**Figure S1.** AFM scans of the BFO<sub>1</sub>/BMO<sub>1</sub> superlattices grown on STO substrates,  $R_{\text{rms}} \approx 200$  pm.

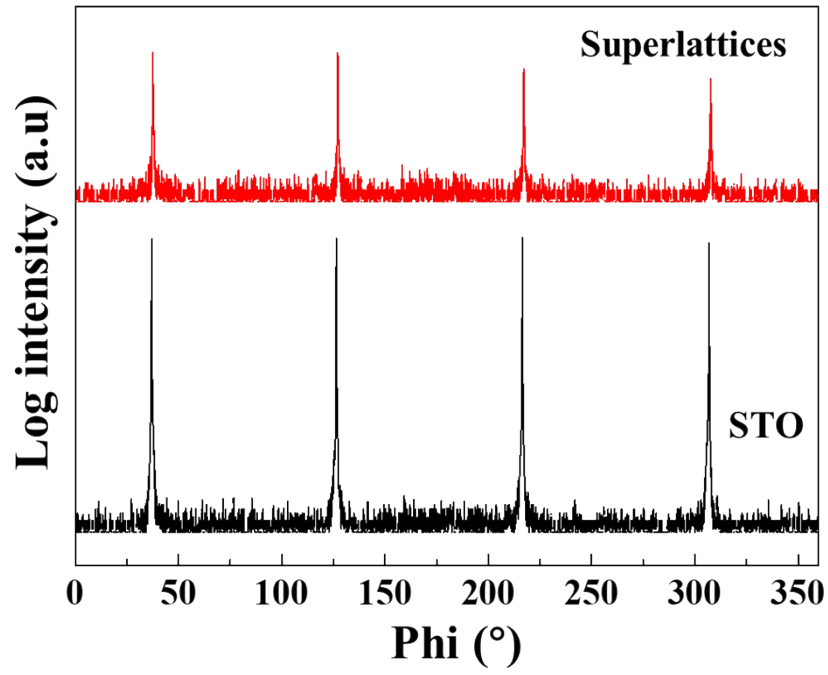

**Figure S2.** The  $\phi$  scans of the BFO/BMO superlattices (202) and STO (202) planes.

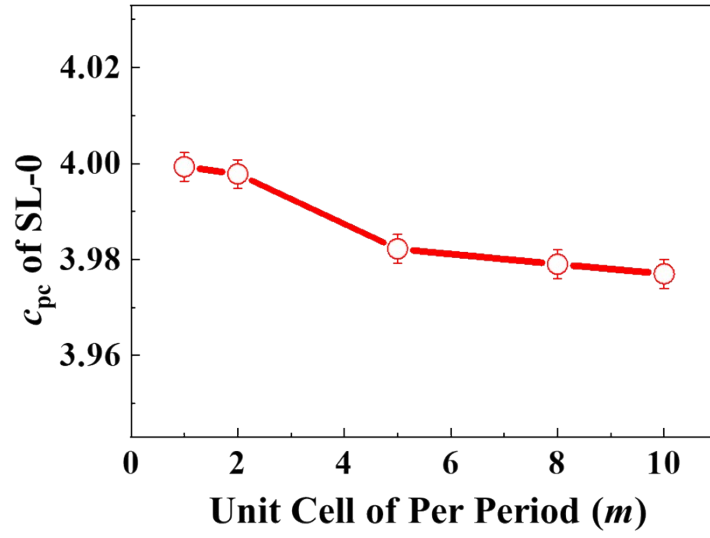

**Figure S3.** Out-of-plane lattice constant  $c_{pc}$  of SL-0 as a function of unit cell per period ( $m$ ).

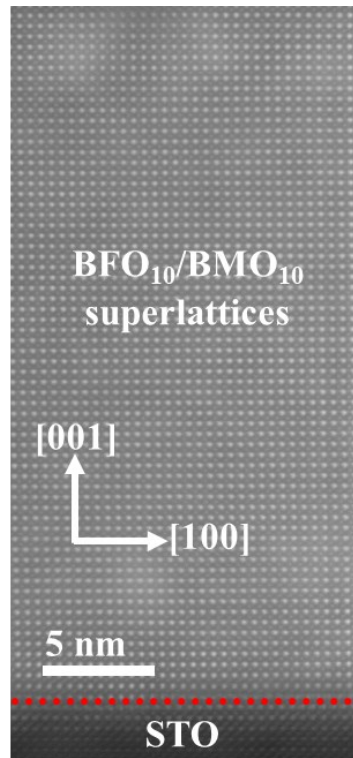

**Figure S4.** Atomic resolution STEM image in HAADF mode. The uniform contrast

indicates a homogeneous film composition.

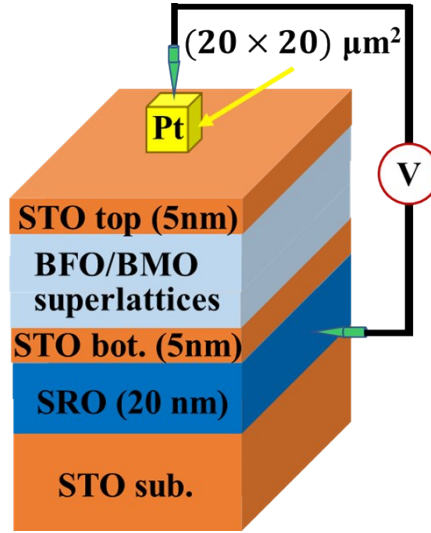

**Figure S5.** Schematic diagram of samples used to measure  $P$ - $E$  loops. Metallic SRO approximately 20 nm thick serves as the bottom electrode and insulating STO about 5 nm thick deposited on the top and bottom of the superlattices forms a sandwich structure. The Pt top electrodes with the size of  $20 \times 20 \mu\text{m}^2$  were fabricated on the surface of the superlattices by photolithography and magnetron sputtering.

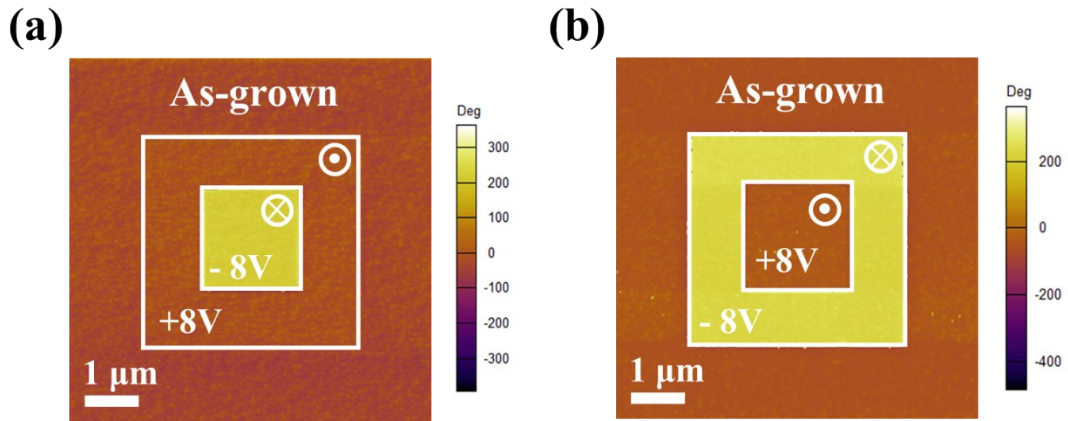

**Figure S6.** Phase of PFM poling map of  $\text{BFO}_{10}/\text{BMO}_{10}$  superlattices at RT. (a) PFM poling map written at  $\pm 8$  V. (b) PFM poling map written at  $\mp 8$  V.

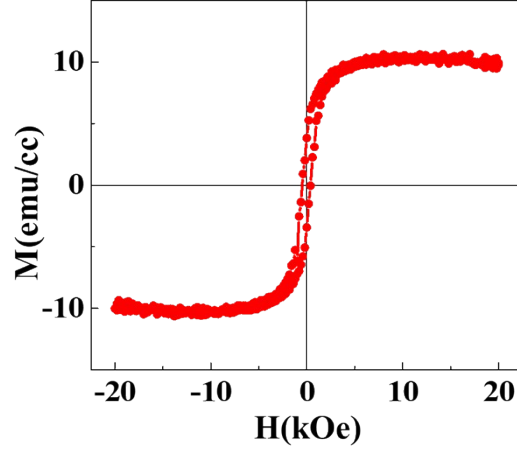

**Figure S7.** In-plane field dependent magnetization  $M$ - $H$  hysteresis loops at 10 K for single-layer BFO thin films on (001) STO substrates.

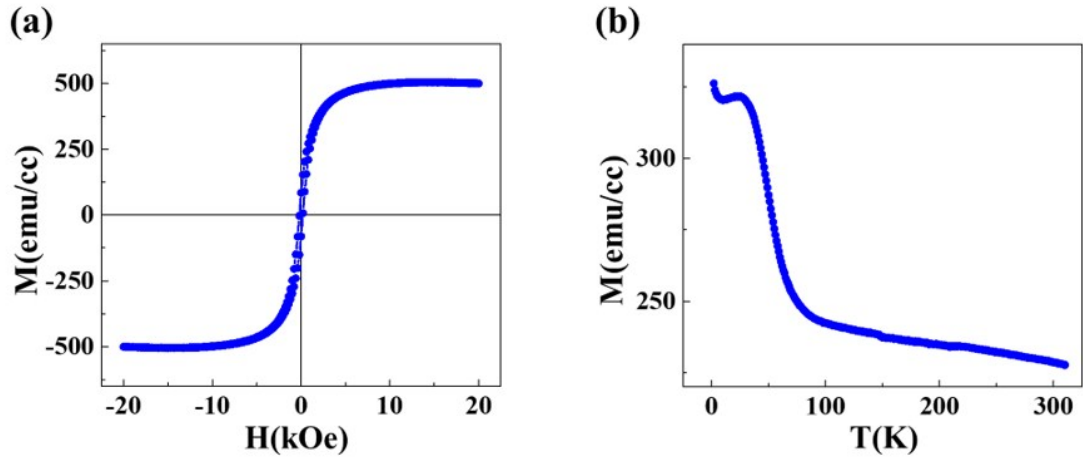

**Figure S8.** Magnetic properties of single-layer BMO thin films on (001) STO substrates. (a) In-plane field dependent magnetization  $M$ - $H$  hysteresis loops at 10 K. (b) In-plane temperature dependent magnetization  $M$ - $T$  curves at 1000 Oe.

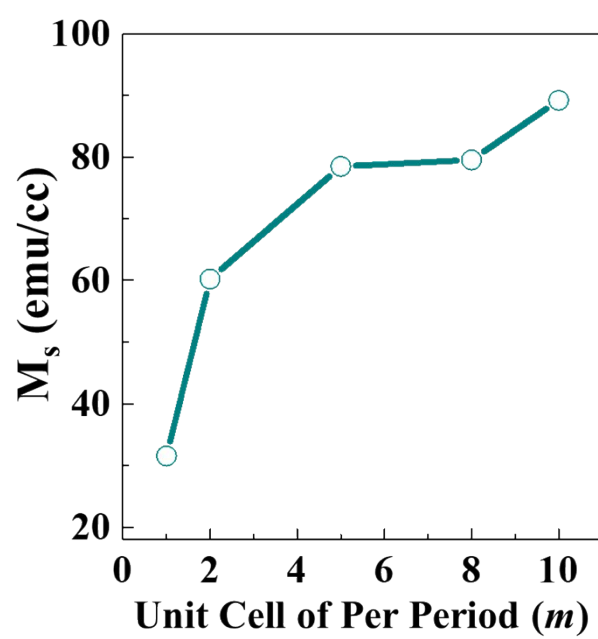

**Figure S9.** Magnetization  $M_s$  as a function of unit cell per period ( $m$ ).
